# Supplementary material for: A highly sensitive morin sensor based on PEDT–Au/rGO nanocomposites modified glassy carbon electrode
Source: Royal Society of Chemistry journal article supplement (doi:10.1039/c7ra08292d), 2017-01-01
Supplement: c7ra08292d1.pdf [file c7ra08292d1.pdf]

## Electronic Supplementary Information

### **A highly sensitive morin sensor based on PEDT-Au/rGO nanocomposites modified glassy carbon electrode**

Wenxue Cheng,<sup>ab</sup> Peng Liu,<sup>a</sup> Min Zhang,<sup>a</sup> Jianzhi Huang,<sup>b</sup> Faliang Cheng<sup>\*a</sup> and Lishi Wang<sup>\*b</sup>

a: Guangdong Engineering and Technology Research Center for Advanced Nanomaterials, Dongguan University of Technology, Dongguan 523808, People's Republic of China.

b: School of Chemistry and Chemical Engineering, South China University of Technology, Guangzhou 510641, People's Republic of China.

E-mail: chengfl@dgut.edu.cn

Tel: +86 769 22862186

\*Corresponding authors.

Prof. Faliang Cheng, E-mail address: chengfl@dgut.edu.cn

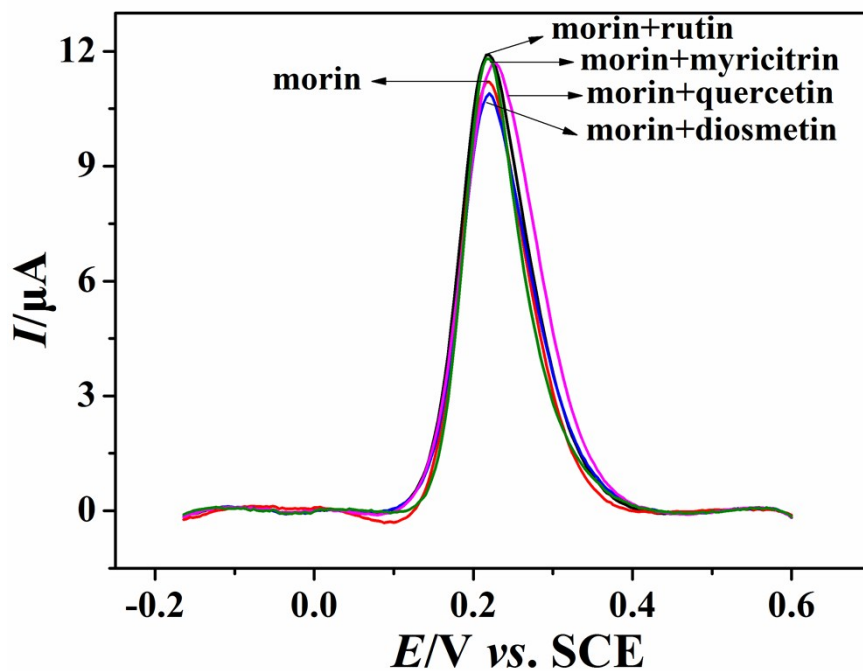

**Fig. S1** The SWVs referring to the interferences from flavonoids recorded on PEDT-Au/rGO/GCE.

**Table.S1** Effects of possible interferences on the oxidation peak current signal of 100  $\mu\text{mol dm}^{-3}$  morin at the PEDT-Au/rGO/GCE in BR buffer solution (pH=6.0).

| Interference                    | Concentration<br>( $\text{mol dm}^{-3}$ ) | Signal change<br>(%) |
|---------------------------------|-------------------------------------------|----------------------|
| NaNO <sub>3</sub>               | 0.01                                      | 2.13                 |
| K <sub>3</sub> PO <sub>4</sub>  | 0.01                                      | 1.39                 |
| CaCl <sub>2</sub>               | 0.01                                      | -3.02                |
| MgSO <sub>4</sub>               | 0.01                                      | -2.49                |
| NH <sub>4</sub> F               | 0.01                                      | 3.40                 |
| Na <sub>2</sub> CO <sub>3</sub> | 0.01                                      | 1.76                 |
| Zn(Ac) <sub>2</sub>             | 0.01                                      | 1.98                 |
| glucose                         | 0.005                                     | -2.08                |
| maltose                         | 0.005                                     | -1.23                |
| sucrose                         | 0.005                                     | 3.76                 |
| ascorbic acid                   | 0.005                                     | -2.84                |
| dopamine                        | 0.005                                     | 3.83                 |
| quercetin                       | 0.001                                     | 2.71                 |
| rutin                           | 0.001                                     | 4.81                 |
| myricitrin                      | 0.001                                     | 3.85                 |
| diosmetin                       | 0.001                                     | -4.63                |

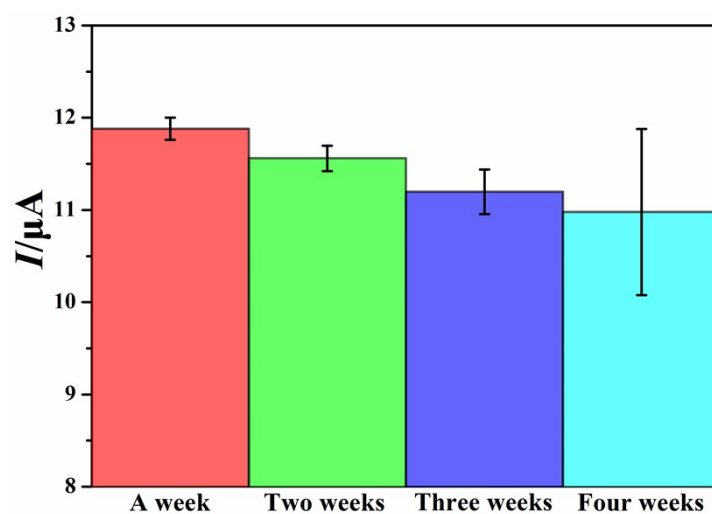

**Fig. S2** The bar diagram of current responses to  $100 \mu\text{mol dm}^{-3}$  morin in BR buffer solution (pH=6.0) recorded on PEDT-Au/rGO/GCEs after storing during different time periods.

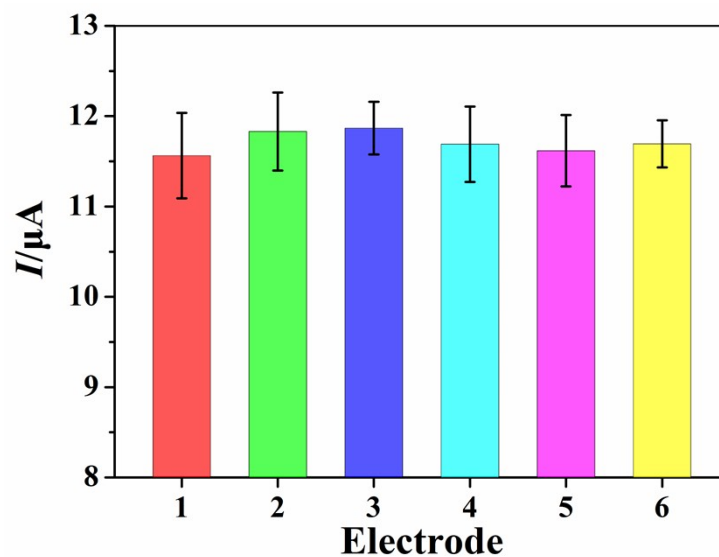

**Fig. S3** The bar diagram of current responses recorded on six identically fabricated PEDT-Au/rGO/GCEs of  $100 \mu\text{mol dm}^{-3}$  morin in BR buffer solution (pH=6.0).
